# Supplementary material
Source: bioRxiv or medRxiv preprint supplement (https://medrxiv.org/highwire/filestream/95700/field_highwire_adjunct_files/0/2020.08.24.20180745-1.pdf)
Supplement: Supplementary file [file 2020.08.24.20180745-1.pdf]

## **إقرار مستنير للبالغين حاملي الأهلية أكثر من ٢١ سنة**

### **الباحثين:**

د لولوه العسعوسي

البيورد الكويتي لطب العائلة – زمالة الكلية الملكية البريطانية MRCGP

Potential trainer at Kuwait family Medicine Residency Program

د ساره الحموري

البيورد الكويتي لطب العائلة – زمالة الكلية الملكية البريطانية MRCGP

Potential trainer at Kuwait family Medicine Residency Program

د ساره العبدالهادي

البيورد الكويتي لطب العائلة – زمالة الكلية الملكية البريطانية MRCGP

Potential trainer at Kuwait family Medicine Residency Program

### **الهدف من الدراسة**

تقييم مدى تأثير متابعة وسائل الإعلام فيما يخص جائحة فايروس كورونا المستجد على الصحة النفسية للأفراد وتحديد اضطراب القلق.

- المشاركة في هذه الدراسة اختيارية.

- في حال الموافقة علي المشاركة في الدراسة يرجى الإجابة على أسئلة الاستبيان المرفق والذي يستغرق دقيقتين.

- يمكنك الانسحاب من الدراسة في أي وقت بدون إبداء الأسباب.

- في حال الانسحاب أو عدم الموافقة لن يترتب على ذلك أي أضرار عليك أو على وضعك الوظيفي.

- لا تتضمن هذه الدراسة أي تجارب طبية أو إجراء فحوصات أو أخذ عينات من المرضى.

- في حال الموافقة يتعهد الباحث بالمحافظة على خصوصية وسرية المعلومات وعدم كتابة أسماء

المشاركين في أي ورقة من أوراق البحث.

يرحب الباحث بالرد علي استفساراتك قبل إعطاء الموافقة

هاتف: 97542829

الايمل: luluafalah@me.com

هل انت تعمل ضمن الطاقم الطبي في وزارة الصحة (طبيب، ممرض او صيدلاني)؟\*

نعم

لا

هل تعاني من احد الامراض التالية : الضغط /السكر/ السرطان/أمراض نفسية? \*

نعم

لا

هل تم تشخيصك بمرض فايروس كورونا المستجد؟ \*

نعم

لا

هل طبق عليك الحجر المنزلي أو المؤسسي؟\*

نعم

لا

هل تتابع أخبار انتشار مرض فايروس كورونا المستجد؟\*

نعم

لا

خلال الأسبوع الماضي كم مره تابعت الأخبار المتعلقة بفايروس كورونا المستجد؟

- نادرا (مرة واحده في اليوم)
- احيانا(نصف اليوم)
- غالبا(معظم اليوم)

الجنس

- ذكر
- أنثى

العمر

- أصغر من 23
- 23-33
- 34-44
- 45-55
- أكبر من 55

الجنسية

- كويتي
- غير كويتي

الحالة الاجتماعية

- متزوج
- أعزب
- مطلق
- أرمل

المستوي التعليمي

- دون الثانوي
- الثانوي
- دبلوم
- جامعي
- دراسات عليا ماجستيرأو دكتوراه

### المحافظة

- العاصمة
- حولي
- الجهراء
- الفروانية
- الأحمدى
- مبارك الكبير

### الحاله الوظيفيه

- موظف حكومي
- متقاعد
- موظف قطاع خاص
- لأعمل
- صاحب عمل
- طالب

خلال الأسبوعين الماضيين كم مره شعرت بأنك سريع الغضب أو الإنفعال؟ \*

- ولامرة
- عدة أيام( ٦-١ أيام خلال الأسبوعين)
- أكثر من نصف الأيام( أكثر من ٧ أيام خلال الأسبوعين)
- تقريبا كل يوم

خلال الأسبوعين الماضيين كم مره شعرت بأنك منزعج من الإحساس بالقلق أو العصبية؟ \*

- ولامرة
- عدة أيام( ٦-١ أيام خلال الأسبوعين)
- اكثر من نصف الأيام( أكثر من ٧ أيام خلال الأسبوعين)
- تقريبا كل يوم

خلال الأسبوعين الماضيين كم مره شعرت انك منزعج من عدم القدرة علي السيطرة علي القلق؟ \*

- ولامرة
- عدة أيام( ٦-١ أيام خلال الأسبوعين)
- أكثر من نصف الأيام( أكثر من ٧ أيام خلال الأسبوعين)
- تقريبا كل يوم



خل الأسبوعين الماضيين كم مره راودك شعور القلق من أمور عدة؟ \*

- ولامرة
- عدة أيام (٦-١ أيام خلال الأسبوعين)
- أكثر من نصف الأيام (أكثر من ٧ أيام خلال الأسبوعين)
- تقريبا كل يوم

خلال الأسبوعين الماضيين كم مرة شعرت بأنك لاتستطيع الأسترخاء ؟ \*

- ولامرة
- عدة أيام (٦-١ أيام خلال الأسبوعين)
- أكثر من نصف الأيام (أكثر من ٧ أيام خلال الأسبوعين)
- تقريبا كل يوم

خلال الأسبوعين الماضيين كم مره شعرت بأنك منزعج من الاضطراب لدرجة أنك لا تستطيع أن تهدأ ؟ \*

- ولامرة
- عدة أيام (٦-١ أيام خلال الأسبوعين)
- أكثر من نصف الأيام (أكثر من ٧ أيام خلال الأسبوعين)
- تقريبا كل يوم

خلال الأسبوعين الماضيين كم مرة شعرت بالخوف من أن شي فطيع سوف يحدث؟ \*

- ولامرة
- عدة أيام (٦-١ أيام خلال الأسبوعين)
- أكثر من نصف الأيام ( أكثر من ٧ أيام خلال الأسبوعين)
- تقريبا كل يوم
